# Supplementary material
Source: HighWire-hosted journal article supplement (https://bmjopen.bmj.com/content/15/2/e083032)
Supplement: inline-supplementary-material-1 [file inline-supplementary-material-1.pdf]

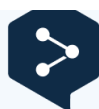

DeepL

Subscribe to DeepL Pro to edit this document.  
Visit [www.DeepL.com/pro](https://www.DeepL.com/pro) for more information.

## Use of evidence summary infographics: evaluation of *BMJ Rapid Recommendation*

Dear Sir/Madam

We would like to invite you to take part in our research project. You will find all the information you need below.

### 1. Objectives of the research project

Our aim is assess your experience of using the infographics developed as part of the *BMJ Rapid Recommendation*. These new didactic formats aim to summarise the evidence supporting recommendations for clinical practice. As part of this study, we would like to evaluate these formats and identify possible areas for improvement.

### 2. Selecting people to take part in the project

Participation is open to all doctors who understand standard scientific English.

### 3. General information about the project

It often takes years for new evidence published in the scientific literature to reach clinicians and patients. Guidelines are a useful tool for guiding doctors in their day-to-day practice. However, the creation of guidelines involves many challenges, as they (i) can be biased by financial and intellectual conflicts of interest; (ii) are difficult to keep up to date; (iii) often do not involve patients; and (iv) are often not updated once published. In addition, there is little evidence as to the best recommendation formats to support clinical decision-making.

In response to these challenges, an international research group (MAGIC), led in particular by Dr Agoritsas, Associate Physician in the Department of General Internal Medicine, has designed *BMJ Rapid Recommendations*. These formats are accompanied by a visual infographic (see Figure 1), which attempts to present the guidelines and scientific evidence in understandable and intuitive formats.

The *BMJ rapid recommendations* have been very successful in terms of access and popularity, which suggests their usefulness in clinical practice. The aim of this study is to directly evaluate your experience as a clinician when you consult these infographics ("user-testing"). The project has been monitored and authorised by the relevant cantonal ethics committee.

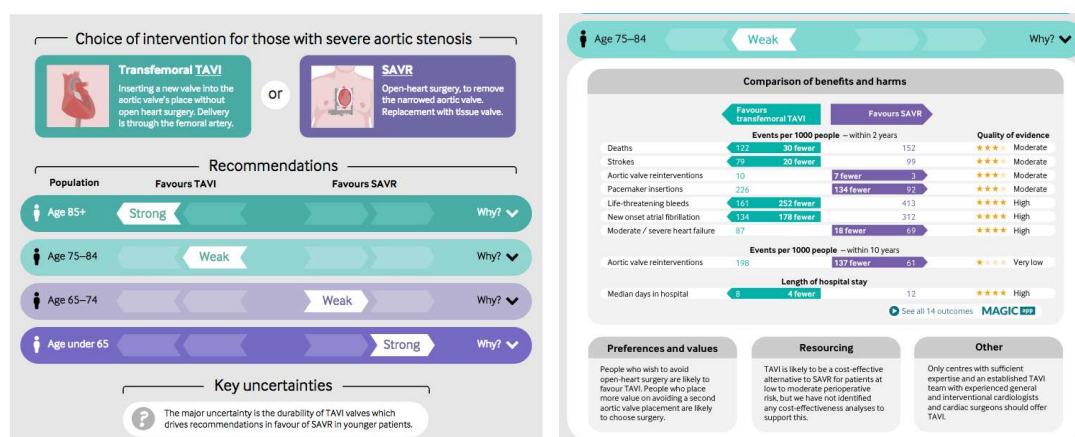

Figur1

#### 4. Procedure for participants

If you agree to take part, you will be called for an appointment at the HUG at your convenience. The interview will last 30 to 45 minutes. You will be introduced to the BMJ's rapid recommendations in the presence of Dr Hirschel or Dr Agoritsas. We will invite you to share your experience as you learn about these formats in real time, and out loud. We would like to make an audio recording of the interview so that we can analyse your experience in detail. The primary aim is to improve these formats and, more generally, to generate knowledge that can be applied to any form of summary of the evidence. The recordings will only be accessible to a restricted group of researchers involved in the study and will not be disseminated. Any citations in previous publications will be anonymised and we will ensure that you cannot be identified.

#### 5. Benefits for participants

Your participation in the project will not be remunerated. The benefit to you is that you will discover these formats as useful clinical tools in your daily practice.

#### 6. Participants' rights

You are free to accept or refuse to take part in the project. If you choose not to take part, or if you choose to take part and change your mind during the course of the project, you will not have to justify your decision. You may ask any questions you may have about the study at any time. Please contact the person indicated at the end of this information sheet.

#### 7. Risks

You will not be exposed to any risks by taking part in this project. The evidence presented is not hypothetical, and corresponds to the current state of knowledge.

#### 8. Data confidentiality

For the purposes of the study, we will record the interviews (audio recordings). Only a limited number of people will be able to consult these data in uncoded form, and exclusively in order to carry out tasks necessary to the project.

#### 9. Financing the project

This project does not require any specific private or public funding.

10. Contact person(s)

If you have any doubts, concerns or questions during or after the study, you can contact one of the following people at any time:

Project manager :

Dr. Tiffany Hirschel Tiffany Hirschel  
Internal doctor, general internal medicine department (SMIG)

Or

Dr Thomas Agoritsas  
Associate Physician, Department of General Internal Medicine (SMIG)

Written declaration of consent for participation in a research project

|                                                                       |                                                                                                 |
|-----------------------------------------------------------------------|-------------------------------------------------------------------------------------------------|
| Title of the study :<br>(scientific title and common title)           | Users experience with evidence infographics:<br>evaluating the <i>BMJ Rapid recommendations</i> |
| Institution responsible :<br>(full address) :                         | Geneva University Hospitals                                                                     |
| Project location :                                                    | Geneva University Hospitals                                                                     |
| Site project manager :<br>(please print name and surname) :           | Tiffany Hirschel                                                                                |
| Participant :<br>(please print name and surname) :<br>Date of birth : | <div><input type="checkbox"/> woman</div> <div><input type="checkbox"/> male</div>              |

- I declare that I have been informed orally and in writing by the investigating doctor of the aims and progress of the project.
- I am taking part in this study voluntarily and accept the written and oral information I have been given about the above-mentioned project. I have had sufficient time to make my decision.
- I have received satisfactory answers to the questions I asked in connection with my participation in the project. I will keep the information sheet and receive a copy of my written declaration of consent.
- I agree that people taking part in the project may listen to my recording.
- I may revoke my consent to take part in the study at any time, without having to justify myself.

|                |                          |
|----------------|--------------------------|
| Place and date | Signature of participant |
|                |                          |

**Declaration by the investigating doctor / person providing information:** I hereby declare that I have explained the nature, importance and scope of the project to the participant. I declare that I have fulfilled all my obligations in relation to this project in accordance with the law in force. If, at any time during the project, I become aware of anything that could affect the participant's consent to take part in the project, I undertake to inform him/her immediately.

|                |                                                                                                                                                                                                                 |
|----------------|-----------------------------------------------------------------------------------------------------------------------------------------------------------------------------------------------------------------|
| Place and date | Surname and first name of the investigating doctor / person providing information to participants in block letters.<br><br>Hirschel Tiffany<br>Signature of investigating doctor / person providing information |
|----------------|-----------------------------------------------------------------------------------------------------------------------------------------------------------------------------------------------------------------|
